# Supplementary material
Source: publisher figshare collection journal article supplement (https://sage.figshare.com/ndownloader/files/18028022)
Supplement: Supplementary file 1 [file 18028022]

**Dermatology Clinical Skills Session – Tutor Questionnaire**

This questionnaire is anonymous. Thank you for your feedback!

My specialty is (please specify if subspecialized, e.g., cardiology): ____________________

My level of training is (circle one):

PGY1 PGY2 PGY3 PGY4 PGY5 Fellow Staff

|  | **Strongly Disagree** |  |  |  | **Strongly Agree** |
| --- | --- | --- | --- | --- | --- |
| The topics presented were appropriate for the level of the learners | 1 | 2 | 3 | 4 | 5 |
| The topics were relevant to the understanding of dermatology | 1 | 2 | 3 | 4 | 5 |
| The resources provided seemed to be helpful to the students | 1 | 2 | 3 | 4 | 5 |
| I found the presence of a dermatology guest facilitator valuable | 1 | 2 | 3 | 4 | 5 |
| The clinical skills session facilitated interaction between the tutor and students | 1 | 2 | 3 | 4 | 5 |
| The students actively participated during the clinical skills session | 1 | 2 | 3 | 4 | 5 |
| Clinical skills sessions are useful for consolidation of information | 1 | 2 | 3 | 4 | 5 |
| Interactive teaching in the clinical skills session makes learning more exciting | 1 | 2 | 3 | 4 | 5 |
| I felt comfortable teaching this subject matter | 1 | 2 | 3 | 4 | 5 |
| I felt that I was given enough resources and preparation to lead this session | 1 | 2 | 3 | 4 | 5 |
| I enjoyed this clinical skills session | 1 | 2 | 3 | 4 | 5 |

**Please provide us with some feedback about how you felt the session went (positive or negative feedback), as well as any specific suggestions for improvement.**
